# Supplementary material
Source: publisher figshare collection journal article supplement (https://gsajournals.figshare.com/ndownloader/files/28102737)
Supplement: Supplementary file 1 [file 28102737]

## Sheet: Table S4
Table S4. Significant results from a genome-wide association study of 15 fresh kernel elemental phenotypes in sweet corn and their intersection with joint-linkage QTL support intervals (NAM QTL number; Table S7) of elemental phenotypes analyzed in the maize NAM panel (Ziegler et al. 2017).
BLUPs	Trait	Covariate	SNP ID	Chromosome	Position (RefGen_v4)	MAF	P-value	FDR-adjusted P-value	R2LR from model without SNP	R2LR from model with SNP	Lambda value from Box-Cox procedure	Transformed Effect Estimates	NAM QTL number
Both locations	Boron	1 PC	S1_189091479	1	191273602	0.429	5.69265e-07	0.0413782	0.0571695	0.108812	-1	0.00829413
Both locations	Boron	1 PC	S1_189092972	1	191275095	0.427	1.91756e-06	0.0445181	0.0571695	0.103529	-1	0.00778675
Both locations	Boron	1 PC	S1_189093006	1	191275129	0.437	1.25693e-06	0.0413782	0.0571695	0.10537	-1	0.00778165
Both locations	Boron	1 PC	S1_189146031	1	191327920	0.432	5.01228e-07	0.0413782	0.0571695	0.109365	-1	0.00814828
Both locations	Boron	1 PC	S1_189146035	1	191327924	0.439	9.50652e-07	0.0413782	0.0571695	0.106584	-1	0.00795175
Both locations	Boron	1 PC	S1_189190704	1	191372589	0.387	2.10898e-06	0.0445181	0.0571695	0.103116	-1	0.00825234
Both locations	Boron	1 PC	S1_189190705	1	191372590	0.387	1.40017e-06	0.0413782	0.0571695	0.104899	-1	0.00839017
Both locations	Cadmium	Endosperm type	S2_144637202	2	149190645	0.282	4.29085e-05	0.0358206	0.137806	0.171989	-0.5	0.57159
Both locations	Cadmium	Endosperm type	S2_144680649	2	149226208	0.267	2.13419e-05	0.0211646	0.137806	0.175151	-0.5	0.608745
Both locations	Cadmium	Endosperm type	S2_145991506	2	150555615	0.408	4.05375e-07	0.000921523	0.137806	0.189578	-0.5	-0.632257
Both locations	Cadmium	Endosperm type	S2_145992346	2	150556455	0.404	2.48025e-07	0.000621163	0.137806	0.190023	-0.5	-0.615378
Both locations	Cadmium	Endosperm type	S2_146015298	2	150578627	0.405	9.83299e-07	0.00199033	0.137806	0.18499	-0.5	-0.57291
Both locations	Cadmium	Endosperm type	S2_146017938	2	150581267	0.395	1.07935e-07	0.000300919	0.137806	0.193984	-0.5	-0.621206
Both locations	Cadmium	Endosperm type	S2_146019410	2	150582739	0.426	2.34856e-07	0.000598325	0.137806	0.191278	-0.5	-0.602559
Both locations	Cadmium	Endosperm type	S2_146019650	2	150582979	0.259	1.26104e-05	0.0144445	0.137806	0.176922	-0.5	0.66853
Both locations	Cadmium	Endosperm type	S2_146019653	2	150582982	0.43	1.64996e-06	0.00293737	0.137806	0.184539	-0.5	-0.610263
Both locations	Cadmium	Endosperm type	S2_146019654	2	150582983	0.431	1.38323e-06	0.00262038	0.137806	0.185051	-0.5	-0.612955
Both locations	Cadmium	Endosperm type	S2_146049810	2	150614055	0.399	2.17623e-06	0.00362915	0.137806	0.182046	-0.5	-0.554659
Both locations	Cadmium	Endosperm type	S2_146050178	2	150614426	0.401	3.65476e-05	0.032145	0.137806	0.171209	-0.5	-0.484833
Both locations	Cadmium	Endosperm type	S2_146050230	2	150614478	0.425	6.57447e-06	0.00907903	0.137806	0.179439	-0.5	-0.533635
Both locations	Cadmium	Endosperm type	S2_146050322	2	150614570	0.42	2.68233e-05	0.0254069	0.137806	0.172724	-0.5	-0.490953
Both locations	Cadmium	Endosperm type	S2_148913268	2	153499641	0.229	6.79152e-08	0.00019677	0.137806	0.195779	-0.5	-0.687486
Both locations	Cadmium	Endosperm type	S2_149824505	2	154417255	0.345	1.59781e-05	0.0172537	0.137806	0.174929	-0.5	-0.522392
Both locations	Cadmium	Endosperm type	S2_149824506	2	154417256	0.345	1.59781e-05	0.0172537	0.137806	0.174929	-0.5	-0.522392
Both locations	Cadmium	Endosperm type	S2_150613542	2	155214444	0.085	2.69798e-07	0.000664432	0.137806	0.191145	-0.5	-1.06869
Both locations	Cadmium	Endosperm type	S2_150836077	2	155436726	0.173	5.45962e-07	0.00120407	0.137806	0.190096	-0.5	0.908708
Both locations	Cadmium	Endosperm type	S2_151734775	2	156442581	0.186	1.18582e-07	0.000324479	0.137806	0.195338	-0.5	0.893379
Both locations	Cadmium	Endosperm type	S2_152505236	2	157225148	0.242	6.2956e-05	0.0484506	0.137806	0.171271	-0.5	0.605765
Both locations	Cadmium	Endosperm type	S2_152505238	2	157225150	0.242	6.2956e-05	0.0484506	0.137806	0.171271	-0.5	0.605765
Both locations	Cadmium	Endosperm type	S2_152505282	2	157225194	0.207	5.70123e-05	0.0445728	0.137806	0.171027	-0.5	0.636623
Both locations	Cadmium	Endosperm type	S2_152505815	2	157225727	0.362	9.63236e-06	0.0118608	0.137806	0.17762	-0.5	-0.527276
Both locations	Cadmium	Endosperm type	S2_152505842	2	157225754	0.353	3.0392e-06	0.00477742	0.137806	0.181972	-0.5	-0.564156
Both locations	Cadmium	Endosperm type	S2_152505844	2	157225756	0.344	5.88574e-06	0.0082046	0.137806	0.179529	-0.5	-0.550609
Both locations	Cadmium	Endosperm type	S2_152506145	2	157226057	0.299	5.42477e-07	0.00120407	0.137806	0.18864	-0.5	-0.672478
Both locations	Cadmium	Endosperm type	S2_152506168	2	157226080	0.296	2.02153e-07	0.000524044	0.137806	0.192117	-0.5	-0.704585
Both locations	Cadmium	Endosperm type	S2_152507514	2	157227426	0.214	3.75662e-05	0.0324172	0.137806	0.172642	-0.5	0.650713
Both locations	Cadmium	Endosperm type	S2_152507516	2	157227428	0.214	3.75662e-05	0.0324172	0.137806	0.172642	-0.5	0.650713
Both locations	Cadmium	Endosperm type	S2_152507518	2	157227430	0.216	2.5731e-05	0.0247045	0.137806	0.174052	-0.5	0.663457
Both locations	Cadmium	Endosperm type	S2_152507546	2	157227458	0.214	3.75662e-05	0.0324172	0.137806	0.172642	-0.5	0.650713
Both locations	Cadmium	Endosperm type	S2_153013827	2	157653584	0.165	1.703e-06	0.0029957	0.137806	0.185526	-0.5	-0.982346
Both locations	Cadmium	Endosperm type	S2_153087164	2	157727563	0.118	1.54252e-08	5.06502e-05	0.137806	0.200642	-0.5	-1.07047
Both locations	Cadmium	Endosperm type	S2_153096922	2	157737319	0.132	3.69062e-12	3.20784e-08	0.137806	0.23197	-0.5	-1.2283
Both locations	Cadmium	Endosperm type	S2_153150167	2	157792846	0.259	1.29439e-06	0.00248391	0.137806	0.18764	-0.5	-0.722528
Both locations	Cadmium	Endosperm type	S2_153150236	2	157792915	0.138	3.45147e-05	0.0309089	0.137806	0.173013	-0.5	0.756915
Both locations	Cadmium	Endosperm type	S2_153320296	2	157947243	0.076	2.28507e-09	9.93077e-06	0.137806	0.210078	-0.5	-1.24937
Both locations	Cadmium	Endosperm type	S2_153320302	2	157947249	0.162	3.62236e-05	0.032145	0.137806	0.172493	-0.5	0.702552
Both locations	Cadmium	Endosperm type	S2_153401456	2	158028615	0.195	1.57763e-06	0.00284284	0.137806	0.186079	-0.5	-0.7641
Both locations	Cadmium	Endosperm type	S2_153401465	2	158028624	0.138	3.89237e-06	0.00586882	0.137806	0.182515	-0.5	-0.867526
Both locations	Cadmium	Endosperm type	S2_153502939	2	158135247	0.137	4.13958e-10	2.18455e-06	0.137806	0.21491	-0.5	-0.97676
Both locations	Cadmium	Endosperm type	S2_153502982	2	158135290	0.158	8.62391e-06	0.0112769	0.137806	0.178452	-0.5	0.780785
Both locations	Cadmium	Endosperm type	S2_153503002	2	158135310	0.158	4.81447e-06	0.00684034	0.137806	0.180805	-0.5	0.798709
Both locations	Cadmium	Endosperm type	S2_153505521	2	158137829	0.152	2.63149e-10	1.55533e-06	0.137806	0.214012	-0.5	-0.969293
Both locations	Cadmium	Endosperm type	S2_153505544	2	158137852	0.155	3.84291e-10	2.1031e-06	0.137806	0.21289	-0.5	-0.953209
Both locations	Cadmium	Endosperm type	S2_153941189	2	158560174	0.183	3.86663e-05	0.0330255	0.137806	0.172266	-0.5	-0.578447
Both locations	Cadmium	Endosperm type	S2_153950806	2	158569791	0.141	3.70181e-06	0.00569779	0.137806	0.182258	-0.5	0.819815
Both locations	Cadmium	Endosperm type	S2_153951465	2	158570450	0.165	8.44134e-06	0.0111367	0.137806	0.179778	-0.5	0.763215
Both locations	Cadmium	Endosperm type	S2_153967103	2	158586086	0.463	4.62428e-05	0.0383872	0.137806	0.172278	-0.5	-0.551186
Both locations	Cadmium	Endosperm type	S2_153967203	2	158586186	0.153	3.21662e-05	0.0293391	0.137806	0.174072	-0.5	-0.626965
Both locations	Cadmium	Endosperm type	S2_154602524	2	159221819	0.156	3.34521e-05	0.0303248	0.137806	0.173866	-0.5	-0.614395
Both locations	Cadmium	Endosperm type	S2_154620944	2	159239552	0.392	3.86867e-07	0.00089319	0.137806	0.189405	-0.5	-0.645268
Both locations	Cadmium	Endosperm type	S2_154620962	2	159239570	0.392	3.09507e-07	0.000737634	0.137806	0.190067	-0.5	-0.655157
Both locations	Cadmium	Endosperm type	S2_155075089	2	159742973	0.274	1.70096e-08	5.46386e-05	0.137806	0.199413	-0.5	-0.676183
Both locations	Cadmium	Endosperm type	S2_155192894	2	159859622	0.259	4.19209e-05	0.035195	0.137806	0.172427	-0.5	-0.514201
Both locations	Cadmium	Endosperm type	S2_155536708	2	160214015	0.204	2.00805e-05	0.0201514	0.137806	0.174599	-0.5	0.767027
Both locations	Cadmium	Endosperm type	S2_155854272	2	160530280	0.444	8.29511e-08	0.000235712	0.137806	0.196757	-0.5	-0.664838
Both locations	Cadmium	Endosperm type	S2_155895832	2	160571833	0.48	1.11488e-05	0.0136146	0.137806	0.177739	-0.5	-0.505286
Both locations	Cadmium	Endosperm type	S2_155895838	2	160571839	0.274	1.16307e-09	5.37056e-06	0.137806	0.210256	-0.5	-0.749668
Both locations	Cadmium	Endosperm type	S2_155904125	2	160580126	0.252	8.62035e-09	3.03276e-05	0.137806	0.202255	-0.5	-0.704641
Both locations	Cadmium	Endosperm type	S2_155904126	2	160580127	0.252	8.62035e-09	3.03276e-05	0.137806	0.202255	-0.5	-0.704641
Both locations	Cadmium	Endosperm type	S2_155904127	2	160580128	0.252	8.62035e-09	3.03276e-05	0.137806	0.202255	-0.5	-0.704641
Both locations	Cadmium	Endosperm type	S2_155904128	2	160580129	0.252	8.62035e-09	3.03276e-05	0.137806	0.202255	-0.5	-0.704641
Both locations	Cadmium	Endosperm type	S2_157033808	2	161666959	0.274	6.32334e-11	4.67175e-07	0.137806	0.222462	-0.5	-0.815738	Cd-1
Both locations	Cadmium	Endosperm type	S2_157035481	2	161668632	0.166	1.39306e-05	0.0157341	0.137806	0.176253	-0.5	0.739106	Cd-1
Both locations	Cadmium	Endosperm type	S2_157035499	2	161668650	0.165	1.17294e-05	0.0138888	0.137806	0.176844	-0.5	0.749743	Cd-1
Both locations	Cadmium	Endosperm type	S2_157035501	2	161668652	0.158	4.53856e-06	0.00651094	0.137806	0.180837	-0.5	0.797824	Cd-1
Both locations	Cadmium	Endosperm type	S2_157035503	2	161668654	0.165	1.17294e-05	0.0138888	0.137806	0.176844	-0.5	0.749743	Cd-1
Both locations	Cadmium	Endosperm type	S2_157213788	2	161854916	0.253	3.03911e-05	0.0282431	0.137806	0.172836	-0.5	-0.587017	Cd-1
Both locations	Cadmium	Endosperm type	S2_157214008	2	161855136	0.354	1.21571e-06	0.00239514	0.137806	0.186813	-0.5	-0.61159	Cd-1
Both locations	Cadmium	Endosperm type	S2_157214019	2	161855147	0.18	3.50049e-08	0.000105559	0.137806	0.200869	-0.5	-0.860664	Cd-1
Both locations	Cadmium	Endosperm type	S2_157234658	2	161883194	0.374	2.75578e-07	0.000667541	0.137806	0.191266	-0.5	-0.692658	Cd-1
Both locations	Cadmium	Endosperm type	S2_157236289	2	161884825	0.131	3.58044e-11	2.78449e-07	0.137806	0.224777	-0.5	-1.02997	Cd-1
Both locations	Cadmium	Endosperm type	S2_157237947	2	161886483	0.133	7.05728e-14	8.02152e-10	0.137806	0.244436	-0.5	-1.23643	Cd-1
Both locations	Cadmium	Endosperm type	S2_157469711	2	162100324	0.196	7.00659e-06	0.00949824	0.137806	0.179406	-0.5	-0.704422	Cd-1
Both locations	Cadmium	Endosperm type	S2_157482751	2	162113364	0.353	1.9318e-06	0.00328099	0.137806	0.184441	-0.5	-0.618248	Cd-1
Both locations	Cadmium	Endosperm type	S2_157482755	2	162113368	0.248	1.32488e-07	0.000349584	0.137806	0.19324	-0.5	-0.72646	Cd-1
Both locations	Cadmium	Endosperm type	S2_157581256	2	162170053	0.142	1.8613e-06	0.00323563	0.137806	0.183529	-0.5	-0.886871	Cd-1
Both locations	Cadmium	Endosperm type	S2_157630297	2	162271882	0.153	2.59664e-16	3.83685e-12	0.137806	0.258872	-0.5	-1.31128	Cd-1
Both locations	Cadmium	Endosperm type	S2_157636817	2	162278402	0.146	1.16275e-13	1.1454e-09	0.137806	0.239919	-0.5	-1.27593	Cd-1
Both locations	Cadmium	Endosperm type	S2_157751785	2	162398572	0.307	2.51679e-11	2.06603e-07	0.137806	0.224916	-0.5	-0.815293	Cd-1
Both locations	Cadmium	Endosperm type	S2_157751802	2	162398589	0.145	1.53259e-23	1.13229e-18	0.137806	0.317114	-0.5	-1.4832	Cd-1
Both locations	Cadmium	Endosperm type	S2_157751821	2	162398608	0.145	1.53259e-23	1.13229e-18	0.137806	0.317114	-0.5	-1.4832	Cd-1
Both locations	Cadmium	Endosperm type	S2_157755537	2	162402373	0.382	2.36128e-06	0.00379247	0.137806	0.183717	-0.5	-0.533469	Cd-1
Both locations	Cadmium	Endosperm type	S2_157755545	2	162402381	0.38	3.55855e-06	0.00553493	0.137806	0.181997	-0.5	-0.524343	Cd-1
Both locations	Cadmium	Endosperm type	S2_157755570	2	162402406	0.131	6.17395e-18	1.17283e-13	0.137806	0.275241	-0.5	-1.37254	Cd-1
Both locations	Cadmium	Endosperm type	S2_157755591	2	162402427	0.334	6.70812e-06	0.00917783	0.137806	0.179189	-0.5	-0.545606	Cd-1
Both locations	Cadmium	Endosperm type	S2_157755615	2	162402451	0.132	2.81058e-19	8.30593e-15	0.137806	0.283104	-0.5	-1.41451	Cd-1
Both locations	Cadmium	Endosperm type	S2_157755618	2	162402454	0.132	2.81058e-19	8.30593e-15	0.137806	0.283104	-0.5	-1.41451	Cd-1
Both locations	Cadmium	Endosperm type	S2_157755645	2	162402481	0.375	1.00608e-06	0.00200892	0.137806	0.186858	-0.5	-0.562479	Cd-1
Both locations	Cadmium	Endosperm type	S2_157755797	2	162402633	0.171	4.76223e-16	5.86397e-12	0.137806	0.260264	-0.5	-1.12959	Cd-1
Both locations	Cadmium	Endosperm type	S2_157755884	2	162402720	0.17	4.37758e-16	5.86397e-12	0.137806	0.26084	-0.5	-1.11826	Cd-1
Both locations	Cadmium	Endosperm type	S2_157901449	2	162537194	0.335	1.11462e-09	5.31285e-06	0.137806	0.209223	-0.5	-0.708024	Cd-1
Both locations	Cadmium	Endosperm type	S2_157901455	2	162537200	0.335	1.11462e-09	5.31285e-06	0.137806	0.209223	-0.5	-0.708024	Cd-1
Both locations	Cadmium	Endosperm type	S2_158379502	2	163010348	0.168	6.34985e-18	1.17283e-13	0.137806	0.275039	-0.5	-1.22465	Cd-1
Both locations	Cadmium	Endosperm type	S2_158379503	2	163010349	0.168	2.47743e-18	6.10116e-14	0.137806	0.278235	-0.5	-1.23601	Cd-1
Both locations	Cadmium	Endosperm type	S2_158385874	2	163016720	0.187	6.7975e-17	1.11601e-12	0.137806	0.264822	-0.5	-1.19283	Cd-1
Both locations	Cadmium	Endosperm type	S2_158407569	2	163038415	0.272	1.15422e-08	3.87614e-05	0.137806	0.202327	-0.5	-0.707881	Cd-1
Both locations	Cadmium	Endosperm type	S2_158407635	2	163038481	0.292	6.1748e-07	0.00132232	0.137806	0.190536	-0.5	-0.654351	Cd-1
Both locations	Cadmium	Endosperm type	S2_158407712	2	163038558	0.246	5.13759e-05	0.0419415	0.137806	0.174081	-0.5	-0.55217	Cd-1
Both locations	Cadmium	Endosperm type	S2_158410023	2	163040869	0.193	8.9104e-07	0.00182864	0.137806	0.188191	-0.5	-0.771831	Cd-1
Both locations	Cadmium	Endosperm type	S2_158453594	2	163081723	0.303	1.48983e-05	0.0165519	0.137806	0.175579	-0.5	0.599026	Cd-1
Both locations	Cadmium	Endosperm type	S2_158507849	2	163133613	0.433	4.29359e-06	0.0062199	0.137806	0.18313	-0.5	-0.553583	Cd-1
Both locations	Cadmium	Endosperm type	S2_158612042	2	163242404	0.444	8.42011e-11	5.65533e-07	0.137806	0.217396	-0.5	-0.734329	Cd-1
Both locations	Cadmium	Endosperm type	S2_158612046	2	163242408	0.443	1.5147e-10	9.32564e-07	0.137806	0.215501	-0.5	-0.724978	Cd-1
Both locations	Cadmium	Endosperm type	S2_158746650	2	163374886	0.468	1.61508e-13	1.49155e-09	0.137806	0.244025	-0.5	-0.918236	Cd-1
Both locations	Cadmium	Endosperm type	S2_158969831	2	163640429	0.491	3.69157e-07	0.000865832	0.137806	0.191698	-0.5	-0.664415	Cd-1
Both locations	Cadmium	Endosperm type	S2_158969856	2	163640454	0.428	4.16621e-06	0.00609513	0.137806	0.181948	-0.5	0.618045	Cd-1
Both locations	Cadmium	Endosperm type	S2_159765450	2	164415588	0.146	8.36053e-20	4.11789e-15	0.137806	0.290679	-0.5	-1.37782	Cd-1
Both locations	Cadmium	Endosperm type	S2_159791238	2	164441365	0.138	1.5997e-05	0.0172537	0.137806	0.175455	-0.5	-0.797971	Cd-1
Both locations	Cadmium	Endosperm type	S2_160727986	2	165341400	0.244	7.81724e-14	8.25065e-10	0.137806	0.238177	-0.5	-1.00429	Cd-1
Both locations	Cadmium	Endosperm type	S2_160797684	2	165407484	0.334	1.27609e-07	0.000342832	0.137806	0.191323	-0.5	-0.599839	Cd-1
Both locations	Cadmium	Endosperm type	S2_160797696	2	165407496	0.344	5.93945e-07	0.00129062	0.137806	0.186208	-0.5	-0.571535	Cd-1
Both locations	Cadmium	Endosperm type	S2_160798115	2	165407915	0.286	7.47324e-11	5.25839e-07	0.137806	0.21713	-0.5	-0.827556	Cd-1
Both locations	Cadmium	Endosperm type	S2_160798374	2	165408174	0.315	8.84069e-11	5.67964e-07	0.137806	0.217693	-0.5	-0.769761	Cd-1
Both locations	Cadmium	Endosperm type	S2_160799140	2	165408940	0.274	3.29311e-08	0.000101374	0.137806	0.196305	-0.5	-0.67994	Cd-1
Both locations	Cadmium	Endosperm type	S2_160799251	2	165409051	0.283	3.47988e-09	1.46913e-05	0.137806	0.205566	-0.5	-0.733057	Cd-1
Both locations	Cadmium	Endosperm type	S2_160799311	2	165409111	0.286	3.61433e-08	0.000106812	0.137806	0.196345	-0.5	-0.680914	Cd-1
Both locations	Cadmium	Endosperm type	S2_160799524	2	165409324	0.279	2.37558e-08	7.46851e-05	0.137806	0.197498	-0.5	-0.716148	Cd-1
Both locations	Cadmium	Endosperm type	S2_160802385	2	165412185	0.274	7.57086e-09	2.94391e-05	0.137806	0.201483	-0.5	-0.722525	Cd-1
Both locations	Cadmium	Endosperm type	S2_160802387	2	165412187	0.274	7.57086e-09	2.94391e-05	0.137806	0.201483	-0.5	-0.722525	Cd-1
Both locations	Cadmium	Endosperm type	S2_160802399	2	165412199	0.274	1.47633e-09	6.61049e-06	0.137806	0.207189	-0.5	-0.742517	Cd-1
Both locations	Cadmium	Endosperm type	S2_160802407	2	165412207	0.273	9.16568e-09	3.14963e-05	0.137806	0.201164	-0.5	-0.695785	Cd-1
Both locations	Cadmium	Endosperm type	S2_160805224	2	165415024	0.324	7.84849e-10	3.999e-06	0.137806	0.209262	-0.5	-0.770138	Cd-1
Both locations	Cadmium	Endosperm type	S2_160805228	2	165415028	0.325	1.62802e-05	0.0174318	0.137806	0.174694	-0.5	0.640107	Cd-1
Both locations	Cadmium	Endosperm type	S2_160805238	2	165415038	0.324	1.24923e-05	0.014421	0.137806	0.175718	-0.5	0.648281	Cd-1
Both locations	Cadmium	Endosperm type	S2_160805748	2	165415548	0.266	1.51607e-05	0.0167177	0.137806	0.175628	-0.5	0.640224	Cd-1
Both locations	Cadmium	Endosperm type	S2_160980739	2	165544799	0.185	3.22574e-10	1.83324e-06	0.137806	0.212698	-0.5	-1.0194	Cd-1
Both locations	Cadmium	Endosperm type	S2_161121304	2	165688061	0.249	7.92565e-06	0.0105505	0.137806	0.177669	-0.5	0.677256	Cd-1
Both locations	Cadmium	Endosperm type	S2_161214970	2	165802675	0.382	3.11167e-05	0.0285581	0.137806	0.17387	-0.5	0.571164	Cd-1
Both locations	Cadmium	Endosperm type	S2_163003043	2	167667039	0.219	3.06747e-05	0.0283284	0.137806	0.171353	-0.5	0.643924	Cd-1
Both locations	Cadmium	Endosperm type	S2_163450820	2	168143254	0.303	1.40557e-05	0.0157341	0.137806	0.175924	-0.5	0.642616	Cd-1
Both locations	Cadmium	Endosperm type	S2_163450828	2	168143262	0.303	1.40557e-05	0.0157341	0.137806	0.175924	-0.5	0.642616	Cd-1
Both locations	Cadmium	Endosperm type	S2_163561272	2	168256444	0.308	6.08539e-05	0.0473257	0.137806	0.170559	-0.5	0.539387	Cd-1
Both locations	Cadmium	Endosperm type	S2_163561563	2	168256735	0.298	5.26868e-05	0.0427753	0.137806	0.17087	-0.5	0.542316	Cd-1
Both locations	Cadmium	Endosperm type	S2_163561587	2	168256759	0.299	5.46428e-05	0.043644	0.137806	0.170758	-0.5	0.541821	Cd-1
Both locations	Cadmium	Endosperm type	S2_163561844	2	168257016	0.284	1.17493e-05	0.0138888	0.137806	0.177168	-0.5	0.604716	Cd-1
Both locations	Cadmium	Endosperm type	S2_163561874	2	168257046	0.284	1.17493e-05	0.0138888	0.137806	0.177168	-0.5	0.604716	Cd-1
Both locations	Cadmium	Endosperm type	S2_163563583	2	168258755	0.293	4.11202e-06	0.00607601	0.137806	0.180882	-0.5	0.625398	Cd-1
Both locations	Cadmium	Endosperm type	S2_163826679	2	168528680	0.181	4.02046e-06	0.00600071	0.137806	0.181274	-0.5	0.756488	Cd-1
Both locations	Cadmium	Endosperm type	S2_164272187	2	168964811	0.231	3.64318e-05	0.032145	0.137806	0.172435	-0.5	-0.559359
Both locations	Cadmium	Endosperm type	S2_164272891	2	168965515	0.221	1.94389e-05	0.0196735	0.137806	0.174546	-0.5	0.676522
Both locations	Cadmium	Endosperm type	S2_164978100	2	169708526	0.224	3.38401e-05	0.0304895	0.137806	0.172943	-0.5	0.6331
Both locations	Cadmium	Endosperm type	S2_164980593	2	169711019	0.208	9.52715e-06	0.0118298	0.137806	0.178243	-0.5	0.676872
Both locations	Cadmium	Endosperm type	S2_164980599	2	169711025	0.208	9.52715e-06	0.0118298	0.137806	0.178243	-0.5	0.676872
Both locations	Cadmium	Endosperm type	S2_167509666	2	172348743	0.318	3.0132e-05	0.0281795	0.137806	0.173017	-0.5	-0.497985
Both locations	Cadmium	Endosperm type	S2_169093477	2	173915843	0.329	3.77348e-05	0.0324172	0.137806	0.171977	-0.5	0.538399
Both locations	Cadmium	Endosperm type	S2_170295607	2	175014008	0.278	3.81396e-06	0.00580988	0.137806	0.180874	-0.5	0.608234
Both locations	Cadmium	Endosperm type	S2_170295674	2	175014075	0.14	5.61389e-05	0.0441234	0.137806	0.172159	-0.5	0.73646
Both locations	Cadmium	Endosperm type	S2_170295681	2	175014082	0.188	7.25164e-06	0.00974106	0.137806	0.179259	-0.5	0.766627
Both locations	Cadmium	Endosperm type	S2_170634988	2	175350001	0.16	1.81389e-05	0.0188626	0.137806	0.175718	-0.5	0.730349
Both locations	Cadmium	Endosperm type	S2_170772140	2	175506789	0.196	7.11051e-09	2.91851e-05	0.137806	0.205792	-0.5	-0.971796
Both locations	Cadmium	Endosperm type	S2_170772319	2	175506968	0.115	5.03514e-05	0.0413335	0.137806	0.173232	-0.5	-0.689916
Both locations	Cadmium	Endosperm type	S2_170772601	2	175507250	0.097	5.51947e-06	0.00776732	0.137806	0.180964	-0.5	-0.837541
Both locations	Cadmium	Endosperm type	S2_170860851	2	175583002	0.101	1.72023e-05	0.0182867	0.137806	0.176532	-0.5	-0.78835
Both locations	Cadmium	Endosperm type	S2_170860876	2	175583027	0.1	2.01839e-05	0.0201514	0.137806	0.175891	-0.5	-0.78103
Both locations	Cadmium	Endosperm type	S2_170861025	2	175583176	0.097	1.40657e-06	0.00263086	0.137806	0.186103	-0.5	-0.901055
Both locations	Cadmium	Endosperm type	S2_170867474	2	175589625	0.097	1.90219e-06	0.00326827	0.137806	0.185104	-0.5	-0.85642
Both locations	Cadmium	Endosperm type	S2_170868011	2	175590162	0.101	1.77613e-05	0.018746	0.137806	0.176873	-0.5	-0.80103
Both locations	Cadmium	Endosperm type	S2_170874412	2	175596188	0.106	7.38016e-07	0.00155787	0.137806	0.188842	-0.5	-0.885136
Both locations	Cadmium	Endosperm type	S2_176009571	2	181223380	0.498	8.81909e-06	0.0114309	0.137806	0.177714	-0.5	-0.564548
Both locations	Cadmium	Endosperm type	S2_176009577	2	181223386	0.496	1.18773e-05	0.0139287	0.137806	0.17659	-0.5	-0.558938
Both locations	Cadmium	Endosperm type	S2_176020217	2	181234026	0.464	5.60403e-05	0.0441234	0.137806	0.169773	-0.5	-0.529465
Both locations	Cadmium	Endosperm type	S2_176020224	2	181234033	0.464	5.60403e-05	0.0441234	0.137806	0.169773	-0.5	-0.529465
Both locations	Cadmium	Endosperm type	S2_176452209	2	181715174	0.431	9.39638e-06	0.0118298	0.137806	0.176852	-0.5	-0.507795
Both locations	Cadmium	Endosperm type	S2_176555836	2	181819747	0.397	3.94666e-05	0.0333238	0.137806	0.171357	-0.5	-0.511856
Both locations	Cadmium	Endosperm type	S2_176610282	2	181873431	0.392	4.79806e-05	0.0396073	0.137806	0.17046	-0.5	-0.511757
Both locations	Cadmium	Endosperm type	S2_176614222	2	181877371	0.405	1.21941e-05	0.0141876	0.137806	0.17659	-0.5	0.520379
Both locations	Cadmium	Endosperm type	S2_176614487	2	181877636	0.4	1.88969e-05	0.0193906	0.137806	0.174595	-0.5	-0.532707
Both locations	Cadmium	Endosperm type	S2_176872713	2	182140481	0.389	2.53932e-05	0.0246852	0.137806	0.173021	-0.5	-0.51293
Both locations	Cadmium	Endosperm type	S2_176872764	2	182140532	0.4	2.57474e-05	0.0247045	0.137806	0.173133	-0.5	-0.507757
Both locations	Cadmium	Endosperm type	S2_176906332	2	182174353	0.47	8.50799e-07	0.00177065	0.137806	0.185981	-0.5	-0.648033
Both locations	Cadmium	Endosperm type	S2_176906538	2	182174559	0.4	1.82547e-05	0.0188626	0.137806	0.175106	-0.5	-0.532986
Both locations	Cadmium	Endosperm type	S2_176906549	2	182174570	0.4	1.82547e-05	0.0188626	0.137806	0.175106	-0.5	-0.532986
Both locations	Cadmium	Endosperm type	S2_177898387	2	183315761	0.363	2.64787e-05	0.0252422	0.137806	0.174011	-0.5	0.60404
Both locations	Cadmium	Endosperm type	S2_178080990	2	183499851	0.424	9.30795e-06	0.0118298	0.137806	0.176179	-0.5	0.522263
Both locations	Cadmium	Endosperm type	S2_178080991	2	183499852	0.429	5.3552e-05	0.0432402	0.137806	0.169516	-0.5	0.477784
Both locations	Cadmium	Endosperm type	S2_178081414	2	183500275	0.479	1.2427e-06	0.0024161	0.137806	0.184799	-0.5	0.603662
Both locations	Cadmium	Endosperm type	S2_178081454	2	183500315	0.466	1.4849e-06	0.00270878	0.137806	0.183582	-0.5	0.602396
Both locations	Cadmium	Endosperm type	S2_178081462	2	183500323	0.466	1.4849e-06	0.00270878	0.137806	0.183582	-0.5	0.602396
Both locations	Cadmium	Endosperm type	S2_178088634	2	183507495	0.415	3.92726e-05	0.0333238	0.137806	0.171622	-0.5	0.478935
Both locations	Cadmium	Endosperm type	S2_178094053	2	183512912	0.43	2.2972e-06	0.0037301	0.137806	0.182278	-0.5	0.564808
Both locations	Cadmium	Endosperm type	S2_178094082	2	183512941	0.431	2.7516e-06	0.00437185	0.137806	0.181613	-0.5	0.561916
Both locations	Cadmium	Endosperm type	S2_179802795	2	185222181	0.426	2.16023e-05	0.02128	0.137806	0.173182	-0.5	0.527793
Both locations	Cadmium	Endosperm type	S2_179802798	2	185222184	0.491	2.21047e-06	0.00362915	0.137806	0.18198	-0.5	0.596923
Both locations	Cadmium	Endosperm type	S2_179802799	2	185222185	0.491	2.21047e-06	0.00362915	0.137806	0.18198	-0.5	0.596923
Both locations	Cadmium	Endosperm type	S2_179802825	2	185222211	0.428	2.39932e-05	0.0234787	0.137806	0.17286	-0.5	0.522813
Both locations	Cadmium	Endosperm type	S2_179802888	2	185222274	0.183	1.9109e-05	0.019473	0.137806	0.175603	-0.5	0.678428
Both locations	Cadmium	Endosperm type	S2_179803083	2	185222469	0.297	5.40677e-05	0.0434193	0.137806	0.170088	-0.5	0.541945
Both locations	Cadmium	Endosperm type	S2_179803173	2	185222559	0.284	9.25284e-06	0.0118298	0.137806	0.177743	-0.5	0.600432
Both locations	Cadmium	Endosperm type	S8_133291000	8	137275632	0.388	2.91058e-05	0.0273932	0.137806	0.173908	-0.5	0.529679
Both locations	Iron		S7_174279369	7	179803836	0.325	4.30492e-07	0.0636103	0.178087	0.227649	-1	0.00189508	Fe-13, Zn-7
Both locations	Zinc		S7_173807634	7	179339051	0.46	7.58342e-07	0.0112054	0.203989	0.249556	0	0.025762
Both locations	Zinc		S7_174148630	7	179673251	0.307	2.03021e-06	0.0214277	0.203989	0.245999	0	-0.0291374
Both locations	Zinc		S7_174148647	7	179673268	0.309	2.51667e-06	0.0247913	0.203989	0.245092	0	-0.0289456
Both locations	Zinc		S7_174279369	7	179803836	0.325	4.17486e-06	0.0342715	0.203989	0.244049	0	-0.0268177	Fe-13, Zn-7
Both locations	Zinc		S7_174331431	7	179894125	0.372	1.51196e-08	0.000643653	0.203989	0.26128	0	-0.0330378	Fe-13, Zn-7
Both locations	Zinc		S7_174331432	7	179894126	0.374	2.6136e-08	0.000643653	0.203989	0.259328	0	-0.0322506	Fe-13, Zn-7
Both locations	Zinc		S7_174404712	7	179965839	0.357	8.97431e-07	0.0120551	0.203989	0.247006	0	-0.0294696	Fe-13, Zn-7
Both locations	Zinc		S7_174505204	7	180066327	0.444	4.50989e-06	0.0350732	0.203989	0.242237	0	-0.0266996	Zn-7
Both locations	Zinc		S7_174506103	7	180067226	0.324	8.71704e-09	0.000643653	0.203989	0.263704	0	-0.032675	Zn-7
Both locations	Zinc		S7_174512415	7	180073538	0.32	1.98959e-07	0.0033655	0.203989	0.252324	0	-0.0298019	Zn-7
Both locations	Zinc		S7_174512441	7	180073564	0.324	1.04361e-06	0.0128505	0.203989	0.246845	0	-0.0284555	Zn-7
Both locations	Zinc		S7_174515556	7	180076679	0.325	1.89519e-08	0.000643653	0.203989	0.260395	0	-0.0316993	Zn-7
Both locations	Zinc		S7_174515604	7	180076727	0.359	3.19245e-10	4.71723e-05	0.203989	0.274841	0	-0.034557	Zn-7
Both locations	Zinc		S7_174515678	7	180076801	0.43	1.64592e-06	0.018708	0.203989	0.246251	0	-0.0268297	Zn-7
Both locations	Zinc		S7_174515799	7	180076922	0.454	1.04125e-07	0.00219797	0.203989	0.254436	0	-0.02914	Zn-7
Both locations	Zinc		S7_174520166	7	180081289	0.393	2.04988e-07	0.0033655	0.203989	0.253368	0	-0.029226	Zn-7
Both locations	Zinc		S7_174531206	7	180092329	0.433	5.4287e-06	0.0381979	0.203989	0.241859	0	-0.0255158	Zn-7
Both locations	Zinc		S7_174574361	7	180135533	0.441	5.1994e-06	0.0381979	0.203989	0.24218	0	-0.0248257	Zn-7
Both locations	Zinc		S7_174574362	7	180135534	0.444	3.00177e-06	0.0277217	0.203989	0.244019	0	-0.0254143	Zn-7
Both locations	Zinc		S7_174582254	7	180143426	0.349	4.13311e-06	0.0342715	0.203989	0.242792	0	-0.025862	Zn-7
Both locations	Zinc		S7_174995289	7	180553729	0.387	2.5573e-08	0.000643653	0.203989	0.261092	0	-0.0294472	Zn-7
NY	Cadmium		S1_7072547	1	7060389	0.396	4.37479e-05	0.037151	0.103763	0.141005	-1	-6.14544
NY	Cadmium		S2_120234402	2	124216816	0.379	1.67517e-05	0.0182679	0.103763	0.144345	-1	7.56696
NY	Cadmium		S2_144637202	2	149190645	0.271	5.21461e-05	0.0416498	0.103763	0.13971	-1	7.37721
NY	Cadmium		S2_145991506	2	150555615	0.408	4.19142e-07	0.00104972	0.103763	0.159674	-1	-8.38737
NY	Cadmium		S2_145992346	2	150556455	0.4	2.13214e-07	0.000605864	0.103763	0.160809	-1	-8.15953
NY	Cadmium		S2_146015298	2	150578627	0.404	3.56529e-07	0.000957845	0.103763	0.158713	-1	-7.83493
NY	Cadmium		S2_146017938	2	150581267	0.394	3.79313e-08	0.000136703	0.103763	0.16836	-1	-8.4518
NY	Cadmium		S2_146019410	2	150582739	0.423	3.32943e-07	0.000911042	0.103763	0.159849	-1	-7.8778
NY	Cadmium		S2_146019650	2	150582979	0.257	2.34205e-05	0.0233433	0.103763	0.143188	-1	8.5402
NY	Cadmium		S2_146019653	2	150582982	0.429	1.8568e-05	0.0197385	0.103763	0.144034	-1	-7.23814
NY	Cadmium		S2_146019654	2	150582983	0.43	1.38707e-05	0.0166536	0.103763	0.145189	-1	-7.32916
NY	Cadmium		S2_146049810	2	150614055	0.396	2.61493e-07	0.000729033	0.103763	0.159936	-1	-7.91366
NY	Cadmium		S2_146050178	2	150614426	0.401	5.38193e-06	0.00828379	0.103763	0.147628	-1	-7.01024
NY	Cadmium		S2_146050230	2	150614478	0.423	2.52691e-06	0.00518585	0.103763	0.152969	-1	-7.35221
NY	Cadmium		S2_146050322	2	150614570	0.416	4.12632e-06	0.00700819	0.103763	0.148823	-1	-7.06989
NY	Cadmium		S2_148913268	2	153499641	0.222	1.06228e-07	0.000341228	0.103763	0.162681	-1	-8.99858
NY	Cadmium		S2_149824505	2	154417255	0.342	9.39627e-06	0.012179	0.103763	0.145855	-1	-7.05588
NY	Cadmium		S2_149824506	2	154417256	0.342	9.39627e-06	0.012179	0.103763	0.145855	-1	-7.05588
NY	Cadmium		S2_150613542	2	155214444	0.082	9.84063e-08	0.000323127	0.103763	0.163072	-1	-14.7716
NY	Cadmium		S2_150836077	2	155436726	0.178	6.57046e-05	0.0490335	0.103763	0.139039	-1	9.50908
NY	Cadmium		S2_151734775	2	156442581	0.187	1.96394e-06	0.00408727	0.103763	0.153716	-1	10.5369
NY	Cadmium		S2_152505282	2	157225194	0.209	6.28381e-05	0.0481093	0.103763	0.139352	-1	8.32364
NY	Cadmium		S2_152505442	2	157225354	0.235	2.28734e-05	0.022992	0.103763	0.144212	-1	8.34355
NY	Cadmium		S2_152505815	2	157225727	0.358	1.09862e-05	0.014116	0.103763	0.145233	-1	-6.85885
NY	Cadmium		S2_152505842	2	157225754	0.352	4.65715e-06	0.00759576	0.103763	0.148557	-1	-7.2162
NY	Cadmium		S2_152505844	2	157225756	0.343	1.43136e-05	0.0166536	0.103763	0.143856	-1	-6.88112
NY	Cadmium		S2_152506145	2	157226057	0.296	1.72687e-06	0.00369806	0.103763	0.152397	-1	-8.46169
NY	Cadmium		S2_152506168	2	157226080	0.292	6.60233e-07	0.0015993	0.103763	0.15578	-1	-8.87634
NY	Cadmium		S2_152507514	2	157227426	0.218	2.10494e-05	0.0219035	0.103763	0.144167	-1	8.85556
NY	Cadmium		S2_152507516	2	157227428	0.218	2.10494e-05	0.0219035	0.103763	0.144167	-1	8.85556
NY	Cadmium		S2_152507518	2	157227430	0.219	1.50194e-05	0.0169412	0.103763	0.145589	-1	9.00272
NY	Cadmium		S2_152507546	2	157227458	0.218	2.10494e-05	0.0219035	0.103763	0.144167	-1	8.85556
NY	Cadmium		S2_153087164	2	157727563	0.119	1.42446e-07	0.000447832	0.103763	0.162289	-1	-13.2909
NY	Cadmium		S2_153096922	2	157737319	0.13	2.31657e-09	1.26778e-05	0.103763	0.176913	-1	-14.3065
NY	Cadmium		S2_153150167	2	157792846	0.256	2.75031e-05	0.0269133	0.103763	0.143856	-1	-8.36236
NY	Cadmium		S2_153150171	2	157792850	0.2	3.09447e-05	0.0294997	0.103763	0.141941	-1	9.36739
NY	Cadmium		S2_153150236	2	157792915	0.144	5.67328e-05	0.0443542	0.103763	0.139799	-1	9.57114
NY	Cadmium		S2_153320296	2	157947243	0.077	9.40677e-08	0.000315901	0.103763	0.163855	-1	-14.8299
NY	Cadmium		S2_153401456	2	158028615	0.195	9.28797e-06	0.012179	0.103763	0.147893	-1	-9.37187
NY	Cadmium		S2_153401465	2	158028624	0.138	3.81133e-06	0.00685969	0.103763	0.151339	-1	-11.5947
NY	Cadmium		S2_153502939	2	158135247	0.135	1.444e-10	1.12299e-06	0.103763	0.188082	-1	-13.2502
NY	Cadmium		S2_153502982	2	158135290	0.161	1.66059e-05	0.0182679	0.103763	0.144434	-1	9.86543
NY	Cadmium		S2_153503002	2	158135310	0.161	1.22471e-05	0.0153578	0.103763	0.145766	-1	9.98163
NY	Cadmium		S2_153505521	2	158137829	0.151	4.14208e-11	3.82527e-07	0.103763	0.192456	-1	-13.4851
NY	Cadmium		S2_153505544	2	158137852	0.153	4.66167e-11	4.05187e-07	0.103763	0.192288	-1	-13.3437
NY	Cadmium		S2_153793884	2	158415332	0.336	1.53881e-05	0.0171871	0.103763	0.143722	-1	7.45302
NY	Cadmium		S2_153793899	2	158415347	0.335	1.29163e-05	0.0160382	0.103763	0.144389	-1	7.54917
NY	Cadmium		S2_153927788	2	158547708	0.166	1.39119e-05	0.0166536	0.103763	0.144523	-1	-8.23249
NY	Cadmium		S2_153938471	2	158557456	0.151	1.22645e-05	0.0153578	0.103763	0.1451	-1	-8.76296
NY	Cadmium		S2_153941189	2	158560174	0.181	3.81813e-06	0.00685969	0.103763	0.15006	-1	-8.59661
NY	Cadmium		S2_153950806	2	158569791	0.144	5.61237e-06	0.00854944	0.103763	0.149839	-1	10.5405
NY	Cadmium		S2_153950951	2	158569936	0.135	4.73976e-05	0.0400204	0.103763	0.140603	-1	9.89303
NY	Cadmium		S2_153951465	2	158570450	0.166	1.68138e-05	0.0182679	0.103763	0.145677	-1	9.67335
NY	Cadmium		S2_153966836	2	158585819	0.386	6.64081e-05	0.0490345	0.103763	0.140022	-1	-7.19947
NY	Cadmium		S2_153967203	2	158586186	0.156	3.25373e-06	0.00616381	0.103763	0.151471	-1	-9.19742
NY	Cadmium		S2_154602524	2	159221819	0.156	7.29427e-06	0.0105668	0.103763	0.148159	-1	-8.75762
NY	Cadmium		S2_154620944	2	159239552	0.39	2.72951e-06	0.0055249	0.103763	0.152485	-1	-8.01828
NY	Cadmium		S2_154620962	2	159239570	0.39	2.85014e-06	0.00561524	0.103763	0.152176	-1	-8.05931
NY	Cadmium		S2_155075089	2	159742973	0.27	1.80845e-08	7.42279e-05	0.103763	0.169741	-1	-8.98124
NY	Cadmium		S2_155192894	2	159859622	0.257	1.41479e-05	0.0166536	0.103763	0.145322	-1	-7.249
NY	Cadmium		S2_155206032	2	159872758	0.184	5.34339e-05	0.0424489	0.103763	0.139307	-1	9.30511
NY	Cadmium		S2_155536708	2	160214015	0.205	9.33893e-06	0.012179	0.103763	0.14621	-1	10.3183
NY	Cadmium		S2_155854272	2	160530280	0.438	3.68986e-07	0.000973608	0.103763	0.161332	-1	-8.41087
NY	Cadmium		S2_155895832	2	160571833	0.475	3.54743e-05	0.0324608	0.103763	0.142209	-1	-6.27822
NY	Cadmium		S2_155895838	2	160571839	0.27	4.01141e-10	2.82255e-06	0.103763	0.185335	-1	-10.2237
NY	Cadmium		S2_155904125	2	160580126	0.249	4.18845e-09	1.87543e-05	0.103763	0.175244	-1	-9.56307
NY	Cadmium		S2_155904126	2	160580127	0.249	4.18845e-09	1.87543e-05	0.103763	0.175244	-1	-9.56307
NY	Cadmium		S2_155904127	2	160580128	0.249	4.18845e-09	1.87543e-05	0.103763	0.175244	-1	-9.56307
NY	Cadmium		S2_155904128	2	160580129	0.249	4.18845e-09	1.87543e-05	0.103763	0.175244	-1	-9.56307
NY	Cadmium		S2_156916446	2	161549464	0.161	8.61839e-06	0.0116832	0.103763	0.146387	-1	11.6478	Cd-1
NY	Cadmium		S2_157033808	2	161666959	0.269	2.43749e-09	1.28631e-05	0.103763	0.181475	-1	-9.88378	Cd-1
NY	Cadmium		S2_157035481	2	161668632	0.166	4.7807e-06	0.00759576	0.103763	0.149795	-1	10.157	Cd-1
NY	Cadmium		S2_157035499	2	161668650	0.165	4.76356e-06	0.00759576	0.103763	0.149751	-1	10.2147	Cd-1
NY	Cadmium		S2_157035501	2	161668652	0.158	7.8665e-06	0.0109658	0.103763	0.147893	-1	10.1641	Cd-1
NY	Cadmium		S2_157035503	2	161668654	0.165	4.76356e-06	0.00759576	0.103763	0.149751	-1	10.2147	Cd-1
NY	Cadmium		S2_157234658	2	161883194	0.37	3.78066e-05	0.0335763	0.103763	0.141986	-1	-7.40121	Cd-1
NY	Cadmium		S2_157236289	2	161884825	0.126	3.02508e-08	0.00011763	0.103763	0.170172	-1	-11.7699	Cd-1
NY	Cadmium		S2_157237947	2	161886483	0.13	8.31146e-09	3.61211e-05	0.103763	0.171895	-1	-13.0532	Cd-1
NY	Cadmium		S2_157469711	2	162100324	0.195	4.3458e-05	0.0371181	0.103763	0.141451	-1	-8.50245	Cd-1
NY	Cadmium		S2_157482755	2	162113368	0.245	8.74746e-06	0.0117504	0.103763	0.146609	-1	-8.15924	Cd-1
NY	Cadmium		S2_157581256	2	162170053	0.136	3.99246e-06	0.00685969	0.103763	0.149751	-1	-11.6022	Cd-1
NY	Cadmium		S2_157630297	2	162271882	0.149	4.45205e-12	5.48203e-08	0.103763	0.197975	-1	-15.2112	Cd-1
NY	Cadmium		S2_157636817	2	162278402	0.145	1.71088e-10	1.26401e-06	0.103763	0.186393	-1	-14.9949	Cd-1
NY	Cadmium		S2_157751785	2	162398572	0.295	7.02336e-10	4.51211e-06	0.103763	0.183089	-1	-10.1437	Cd-1
NY	Cadmium		S2_157751802	2	162398589	0.139	2.63874e-19	1.94953e-14	0.103763	0.26244	-1	-18.4289	Cd-1
NY	Cadmium		S2_157751821	2	162398608	0.139	2.63874e-19	1.94953e-14	0.103763	0.26244	-1	-18.4289	Cd-1
NY	Cadmium		S2_157755537	2	162402373	0.375	5.75781e-05	0.0447782	0.103763	0.140067	-1	-6.11957	Cd-1
NY	Cadmium		S2_157755570	2	162402406	0.127	4.48511e-14	8.28411e-10	0.103763	0.216709	-1	-16.4728	Cd-1
NY	Cadmium		S2_157755615	2	162402451	0.13	8.64206e-16	2.55394e-11	0.103763	0.231262	-1	-17.2614	Cd-1
NY	Cadmium		S2_157755618	2	162402454	0.13	8.64206e-16	2.55394e-11	0.103763	0.231262	-1	-17.2614	Cd-1
NY	Cadmium		S2_157755645	2	162402481	0.371	5.38318e-05	0.0425363	0.103763	0.140514	-1	-6.23449	Cd-1
NY	Cadmium		S2_157755797	2	162402633	0.168	1.19432e-13	1.96084e-09	0.103763	0.214468	-1	-13.9113	Cd-1
NY	Cadmium		S2_157755884	2	162402720	0.169	3.09052e-13	4.15147e-09	0.103763	0.210992	-1	-13.4742	Cd-1
NY	Cadmium		S2_157901449	2	162537194	0.327	2.02079e-09	1.14845e-05	0.103763	0.178963	-1	-9.34634	Cd-1
NY	Cadmium		S2_157901455	2	162537200	0.327	2.02079e-09	1.14845e-05	0.103763	0.178963	-1	-9.34634	Cd-1
NY	Cadmium		S2_158379502	2	163010348	0.162	2.7922e-14	5.89403e-10	0.103763	0.220079	-1	-14.734	Cd-1
NY	Cadmium		S2_158379503	2	163010349	0.162	2.13889e-14	5.26744e-10	0.103763	0.220889	-1	-14.7584	Cd-1
NY	Cadmium		S2_158385874	2	163016720	0.182	1.63739e-13	2.41944e-09	0.103763	0.21218	-1	-14.296	Cd-1
NY	Cadmium		S2_158407569	2	163038415	0.258	1.97075e-07	0.000570983	0.103763	0.161767	-1	-8.71935	Cd-1
NY	Cadmium		S2_158410023	2	163040869	0.187	3.05043e-05	0.0292686	0.103763	0.143722	-1	-8.90383	Cd-1
NY	Cadmium		S2_158451766	2	163079895	0.403	9.56292e-07	0.0021739	0.103763	0.153673	-1	8.81284	Cd-1
NY	Cadmium		S2_158451776	2	163079905	0.369	7.56358e-06	0.0106439	0.103763	0.144345	-1	8.65068	Cd-1
NY	Cadmium		S2_158453594	2	163081723	0.301	8.79784e-07	0.00203123	0.103763	0.154551	-1	8.8265	Cd-1
NY	Cadmium		S2_158612042	2	163242404	0.44	5.39797e-12	6.1355e-08	0.103763	0.201425	-1	-10.3017	Cd-1
NY	Cadmium		S2_158612046	2	163242408	0.439	1.07348e-11	1.133e-07	0.103763	0.198849	-1	-10.1606	Cd-1
NY	Cadmium		S2_158746650	2	163374886	0.461	1.74794e-11	1.72186e-07	0.103763	0.200637	-1	-11.1111	Cd-1
NY	Cadmium		S2_158969831	2	163640429	0.486	1.42478e-05	0.0166536	0.103763	0.146697	-1	-7.60077	Cd-1
NY	Cadmium		S2_158969856	2	163640454	0.435	2.60495e-05	0.0256609	0.103763	0.144123	-1	7.51976	Cd-1
NY	Cadmium		S2_159086199	2	163755802	0.239	6.46587e-05	0.0487329	0.103763	0.13971	-1	8.24546	Cd-1
NY	Cadmium		S2_159765450	2	164415588	0.144	4.05693e-16	1.9982e-11	0.103763	0.236079	-1	-16.6427	Cd-1
NY	Cadmium		S2_160727986	2	165341400	0.247	5.26164e-11	4.31928e-07	0.103763	0.188082	-1	-11.8127	Cd-1
NY	Cadmium		S2_160788965	2	165398765	0.218	4.72976e-06	0.00759576	0.103763	0.147274	-1	9.25623	Cd-1
NY	Cadmium		S2_160788996	2	165398796	0.219	3.40346e-06	0.00636585	0.103763	0.148203	-1	9.353	Cd-1
NY	Cadmium		S2_160797684	2	165407484	0.331	1.86067e-07	0.000549871	0.103763	0.160591	-1	-7.88564	Cd-1
NY	Cadmium		S2_160797696	2	165407496	0.338	4.12098e-07	0.00104972	0.103763	0.158058	-1	-7.72177	Cd-1
NY	Cadmium		S2_160798096	2	165407896	0.253	1.12353e-05	0.0143116	0.103763	0.144389	-1	8.8605	Cd-1
NY	Cadmium		S2_160798115	2	165407915	0.283	3.07365e-09	1.5661e-05	0.103763	0.175244	-1	-10.0389	Cd-1
NY	Cadmium		S2_160798374	2	165408174	0.313	6.46537e-10	4.34244e-06	0.103763	0.183217	-1	-9.75168	Cd-1
NY	Cadmium		S2_160798572	2	165408372	0.229	7.97025e-06	0.0110065	0.103763	0.145278	-1	9.01884	Cd-1
NY	Cadmium		S2_160798695	2	165408495	0.269	5.4523e-07	0.00134274	0.103763	0.154903	-1	9.72182	Cd-1
NY	Cadmium		S2_160799140	2	165408940	0.277	9.71563e-07	0.00217515	0.103763	0.153629	-1	-8.00655	Cd-1
NY	Cadmium		S2_160799251	2	165409051	0.282	1.33313e-09	8.20774e-06	0.103763	0.18173	-1	-9.97466	Cd-1
NY	Cadmium		S2_160799311	2	165409111	0.286	4.98754e-08	0.000171388	0.103763	0.165504	-1	-8.97302	Cd-1
NY	Cadmium		S2_160799524	2	165409324	0.282	3.8346e-07	0.000994049	0.103763	0.157182	-1	-8.62381	Cd-1
NY	Cadmium		S2_160802385	2	165412185	0.275	1.59741e-07	0.000481709	0.103763	0.16046	-1	-8.70313	Cd-1
NY	Cadmium		S2_160802387	2	165412187	0.275	1.59741e-07	0.000481709	0.103763	0.16046	-1	-8.70313	Cd-1
NY	Cadmium		S2_160802399	2	165412199	0.277	3.3623e-08	0.000124205	0.103763	0.166457	-1	-8.9871	Cd-1
NY	Cadmium		S2_160802407	2	165412207	0.275	3.93995e-08	0.000138613	0.103763	0.166673	-1	-8.82258	Cd-1
NY	Cadmium		S2_160805224	2	165415024	0.326	2.4486e-08	9.77863e-05	0.103763	0.166976	-1	-9.25725	Cd-1
NY	Cadmium		S2_160805228	2	165415028	0.323	6.97043e-06	0.0101977	0.103763	0.146121	-1	8.73308	Cd-1
NY	Cadmium		S2_160805238	2	165415038	0.323	6.97043e-06	0.0101977	0.103763	0.146121	-1	8.73308	Cd-1
NY	Cadmium		S2_160805748	2	165415548	0.264	1.71113e-05	0.0184554	0.103763	0.142921	-1	8.29052	Cd-1
NY	Cadmium		S2_160980739	2	165544799	0.183	3.16223e-08	0.00011981	0.103763	0.164896	-1	-12.0299	Cd-1
NY	Cadmium		S2_161121304	2	165688061	0.252	1.19944e-06	0.00264524	0.103763	0.153233	-1	9.43024	Cd-1
NY	Cadmium		S2_161214970	2	165802675	0.375	7.4438e-06	0.0106311	0.103763	0.147893	-1	8.06813	Cd-1
NY	Cadmium		S2_163003043	2	167667039	0.219	2.80824e-06	0.00560745	0.103763	0.147362	-1	9.3735	Cd-1
NY	Cadmium		S2_163445458	2	168137892	0.234	6.35353e-06	0.00957969	0.103763	0.146387	-1	8.21189	Cd-1
NY	Cadmium		S2_163450820	2	168143254	0.299	7.12417e-07	0.00167092	0.103763	0.155298	-1	9.46641	Cd-1
NY	Cadmium		S2_163450828	2	168143262	0.299	7.12417e-07	0.00167092	0.103763	0.155298	-1	9.46641	Cd-1
NY	Cadmium		S2_163561272	2	168256444	0.305	3.62151e-05	0.0328295	0.103763	0.139933	-1	7.27649	Cd-1
NY	Cadmium		S2_163561498	2	168256670	0.322	5.50706e-05	0.0432837	0.103763	0.137741	-1	6.95653	Cd-1
NY	Cadmium		S2_163561563	2	168256735	0.295	4.98542e-05	0.0411539	0.103763	0.138413	-1	7.11641	Cd-1
NY	Cadmium		S2_163561587	2	168256759	0.296	4.93197e-05	0.0409415	0.103763	0.138457	-1	7.11374	Cd-1
NY	Cadmium		S2_163561844	2	168257016	0.282	1.47621e-05	0.0169091	0.103763	0.143188	-1	7.74231	Cd-1
NY	Cadmium		S2_163561874	2	168257046	0.282	1.47621e-05	0.0169091	0.103763	0.143188	-1	7.74231	Cd-1
NY	Cadmium		S2_163563583	2	168258755	0.29	1.40706e-05	0.0166536	0.103763	0.1435	-1	7.71851	Cd-1
NY	Cadmium		S2_163564007	2	168259179	0.466	4.2457e-05	0.0366784	0.103763	0.140558	-1	6.91658	Cd-1
NY	Cadmium		S2_163564609	2	168259781	0.388	2.12985e-05	0.021979	0.103763	0.14301	-1	6.83411	Cd-1
NY	Cadmium		S2_163718239	2	168420245	0.243	8.18483e-06	0.0111982	0.103763	0.145944	-1	8.908	Cd-1
NY	Cadmium		S2_163826679	2	168528680	0.182	1.85671e-05	0.0197385	0.103763	0.143411	-1	9.1876	Cd-1
NY	Cadmium		S2_164272891	2	168965515	0.223	3.51971e-06	0.006501	0.103763	0.149176	-1	9.42005
NY	Cadmium		S2_164989794	2	169720218	0.314	3.51133e-05	0.0324608	0.103763	0.141986	-1	-6.84261
NY	Cadmium		S2_167509666	2	172348743	0.312	3.73735e-05	0.033469	0.103763	0.141585	-1	-6.54875
NY	Cadmium		S2_169093477	2	173915843	0.327	6.64906e-05	0.0490345	0.103763	0.137158	-1	6.82137
NY	Cadmium		S2_169542052	2	174372882	0.294	3.64587e-05	0.0328488	0.103763	0.140603	-1	8.04901
NY	Cadmium		S2_169740981	2	174576140	0.308	4.85656e-05	0.0405432	0.103763	0.139307	-1	7.293
NY	Cadmium		S2_169758409	2	174590076	0.257	2.35388e-05	0.0233433	0.103763	0.142164	-1	7.88705
NY	Cadmium		S2_170295607	2	175014008	0.279	1.39364e-06	0.00302834	0.103763	0.153804	-1	8.31055
NY	Cadmium		S2_170295640	2	175014041	0.297	4.06633e-05	0.0355532	0.103763	0.14096	-1	7.65605
NY	Cadmium		S2_170295681	2	175014082	0.19	5.37867e-06	0.00828379	0.103763	0.149044	-1	10.2689
NY	Cadmium		S2_170621088	2	175335631	0.453	6.49719e-05	0.0487329	0.103763	0.138771	-1	-6.83928
NY	Cadmium		S2_170621093	2	175335636	0.451	5.17424e-05	0.041552	0.103763	0.13962	-1	-6.92149
NY	Cadmium		S2_170621094	2	175335637	0.451	5.17424e-05	0.041552	0.103763	0.13962	-1	-6.92149
NY	Cadmium		S2_170621095	2	175335638	0.451	5.17424e-05	0.041552	0.103763	0.13962	-1	-6.92149
NY	Cadmium		S2_170621106	2	175335649	0.451	5.17424e-05	0.041552	0.103763	0.13962	-1	-6.92149
NY	Cadmium		S2_170634988	2	175350001	0.161	5.92232e-05	0.0458164	0.103763	0.139978	-1	8.99294
NY	Cadmium		S2_170772140	2	175506789	0.195	1.07431e-08	4.53551e-05	0.103763	0.174043	-1	-12.6546
NY	Cadmium		S2_170772601	2	175507250	0.097	1.4942e-05	0.0169412	0.103763	0.1443	-1	-10.5067
NY	Cadmium		S2_170861025	2	175583176	0.096	4.26949e-05	0.0366784	0.103763	0.13971	-1	-10.2941
NY	Cadmium		S2_170867474	2	175589625	0.096	4.82424e-05	0.0405023	0.103763	0.139441	-1	-9.84053
NY	Cadmium		S2_173832776	2	178664435	0.44	4.16934e-05	0.0362394	0.103763	0.138994	-1	6.31983
NY	Cadmium		S2_174462774	2	179309469	0.401	1.78421e-06	0.00376626	0.103763	0.152485	-1	-7.86631
NY	Cadmium		S2_174471336	2	179318028	0.29	5.99263e-05	0.0461189	0.103763	0.138457	-1	7.99115
NY	Cadmium		S2_174476424	2	179323116	0.431	6.47808e-05	0.0487329	0.103763	0.136845	-1	6.51546
NY	Cadmium		S2_176009571	2	181223380	0.495	4.22128e-06	0.00708801	0.103763	0.149176	-1	-7.6444
NY	Cadmium		S2_176009577	2	181223386	0.494	6.87164e-06	0.0101977	0.103763	0.147229	-1	-7.51061
NY	Cadmium		S2_176020217	2	181234026	0.464	1.35457e-05	0.0165416	0.103763	0.142877	-1	-7.45554
NY	Cadmium		S2_176020224	2	181234033	0.464	1.35457e-05	0.0165416	0.103763	0.142877	-1	-7.45554
NY	Cadmium		S2_176614487	2	181877636	0.404	7.48254e-06	0.0106311	0.103763	0.147052	-1	-7.26924
NY	Cadmium		S2_176872713	2	182140481	0.394	2.19067e-05	0.022324	0.103763	0.142209	-1	-6.7622
NY	Cadmium		S2_176872764	2	182140532	0.405	1.54701e-05	0.0171871	0.103763	0.143945	-1	-6.84235
NY	Cadmium		S2_176906332	2	182174353	0.474	3.95663e-06	0.00685969	0.103763	0.149618	-1	-8.00507
NY	Cadmium		S2_176906350	2	182174371	0.335	2.88538e-05	0.0280493	0.103763	0.142075	-1	7.90786
NY	Cadmium		S2_177898387	2	183315761	0.369	5.31053e-06	0.00828379	0.103763	0.148955	-1	8.62082
NY	Cadmium		S2_178080990	2	183499851	0.419	5.14695e-05	0.041552	0.103763	0.138368	-1	6.34844
NY	Cadmium		S2_178081414	2	183500275	0.473	6.39985e-05	0.0487329	0.103763	0.137875	-1	6.60794
NY	Cadmium		S2_178081454	2	183500315	0.46	6.70332e-05	0.0490345	0.103763	0.137158	-1	6.61207
NY	Cadmium		S2_178081462	2	183500323	0.46	6.70332e-05	0.0490345	0.103763	0.137158	-1	6.61207
NY	Cadmium		S2_178094053	2	183512912	0.426	3.17056e-06	0.00614537	0.103763	0.150766	-1	7.33324
NY	Cadmium		S2_178094082	2	183512941	0.427	3.2024e-06	0.00614537	0.103763	0.150766	-1	7.34814
NY	Cadmium		S2_179802798	2	185222184	0.494	3.98369e-06	0.00685969	0.103763	0.146431	-1	7.66048
NY	Cadmium		S2_179802799	2	185222185	0.494	3.98369e-06	0.00685969	0.103763	0.146431	-1	7.66048
NY	Cadmium		S2_180527555	2	185947879	0.383	2.96781e-05	0.028662	0.103763	0.141585	-1	-7.04535
NY	Cadmium		S2_180527556	2	185947880	0.382	2.14194e-05	0.021979	0.103763	0.142877	-1	-7.18469
NY	Cadmium		S2_180527558	2	185947882	0.388	3.52145e-05	0.0324608	0.103763	0.140826	-1	-6.94488
NY	Cadmium		S2_180527559	2	185947883	0.39	3.55887e-05	0.0324608	0.103763	0.140692	-1	-6.90821
NY	Cadmium		S2_180527561	2	185947885	0.39	3.55887e-05	0.0324608	0.103763	0.140692	-1	-6.90821
NY	Cadmium		S2_180527563	2	185947887	0.39	3.55887e-05	0.0324608	0.103763	0.140692	-1	-6.90821
NY	Cadmium		S2_180527565	2	185947889	0.39	3.55887e-05	0.0324608	0.103763	0.140692	-1	-6.90821
NY	Cadmium		S2_180660711	2	186080017	0.364	2.26828e-05	0.0229566	0.103763	0.143277	-1	-6.80009
NY	Cadmium		S2_43761656	2	45615207	0.36	3.79478e-05	0.0335763	0.103763	0.142209	-1	-7.77186
NY	Cadmium		S3_34108049	3	33741793	0.458	3.98651e-05	0.0350628	0.103763	0.141495	-1	6.59575
NY	Iron		S1_253362401	1	258938428	0.101	4.29e-06	0.0658205	0.120919	0.165159	-0.5	0.00415207
NY	Iron		S1_253362402	1	258938429	0.101	4.29e-06	0.0658205	0.120919	0.165159	-0.5	0.00415207
NY	Iron		S10_80692618	10	80113724	0.135	4.45e-06	0.0658205	0.120919	0.166286	-0.5	0.00378334
NY	Iron		S3_165412964	3	168044856	0.136	3.06e-06	0.0658205	0.120919	0.170218	-0.5	0.00356452
NY	Iron		S3_165412965	3	168044857	0.136	3.06e-06	0.0658205	0.120919	0.170218	-0.5	0.00356452
NY	Iron		S3_165412967	3	168044859	0.13	1.65e-06	0.0658205	0.120919	0.172585	-0.5	0.00383709
NY	Iron		S3_165412969	3	168044861	0.123	2.55e-06	0.0658205	0.120919	0.170477	-0.5	0.00378029
NY	Iron		S3_165412972	3	168044864	0.125	3.48e-06	0.0658205	0.120919	0.169226	-0.5	0.0037344
NY	Iron		S3_165412973	3	168044865	0.123	2.55e-06	0.0658205	0.120919	0.170477	-0.5	0.00378029
NY	Iron		S7_173746830	7	179281822	0.313	5.38e-06	0.0722646	0.120919	0.1662	-0.5	-0.00221201
NY	Iron		S7_174279369	7	179803836	0.327	6.15e-07	0.0658205	0.120919	0.175332	-0.5	0.00273502	Fe-13, Zn-7
NY	Nickel		S5_213077650	5	218911009	0.287	1.49924e-06	0.0443061	0.084634	0.13795	-1	0.294468
NY	Nickel		S9_2213279	9	1933685	0.399	7.14065e-08	0.00527558	0.084634	0.150168	-1	-0.309715	Ni-5
NY	Nickel		S9_2213288	9	1933694	0.483	8.28097e-07	0.0305903	0.084634	0.140472	-1	-0.278377	Ni-5
NY	Nickel		S9_2213885	9	1934291	0.422	2.14916e-07	0.0105855	0.084634	0.146177	-1	0.299916	Ni-5
NY	Nickel		S9_2213924	9	1934330	0.509	2.79506e-08	0.00413003	0.084634	0.156042	-1	0.310694	Ni-5
NY	Zinc		S7_174331431	7	179894125	0.374	6.96861e-07	0.0205939	0.120076	0.173211	-0.5	0.00221591	Fe-13, Zn-7
NY	Zinc		S7_174331432	7	179894126	0.377	1.42295e-06	0.0300368	0.120076	0.170069	-0.5	0.00213762	Fe-13, Zn-7
NY	Zinc		S7_174404712	7	179965839	0.362	1.11457e-06	0.0274485	0.120076	0.171405	-0.5	0.00224257	Fe-13, Zn-7
NY	Zinc		S7_174506103	7	180067226	0.327	2.01895e-07	0.0149162	0.120076	0.177623	-0.5	0.00224214	Zn-7
NY	Zinc		S7_174515556	7	180076679	0.331	5.59858e-07	0.0205939	0.120076	0.173511	-0.5	0.00213965	Zn-7
NY	Zinc		S7_174515604	7	180076727	0.366	4.88868e-08	0.00722361	0.120076	0.183751	-0.5	0.00227806	Zn-7
NY	Zinc		S7_174995289	7	180553729	0.39	4.96311e-07	0.0205939	0.120076	0.174755	-0.5	0.00201714	Zn-7
WI	Cadmium	Endosperm type	S2_146019653	2	150582982	0.43	1.61841e-05	0.032364	0.0899034	0.134346	-0.5	-0.615371
WI	Cadmium	Endosperm type	S2_146019654	2	150582983	0.432	1.62081e-05	0.032364	0.0899034	0.134204	-0.5	-0.614018
WI	Cadmium	Endosperm type	S2_148913268	2	153499641	0.228	4.78136e-06	0.0133292	0.0899034	0.139966	-0.5	-0.658454
WI	Cadmium	Endosperm type	S2_150836077	2	155436726	0.184	1.4944e-05	0.0311007	0.0899034	0.13557	-0.5	0.875563
WI	Cadmium	Endosperm type	S2_152505842	2	157225754	0.352	1.52605e-05	0.0313184	0.0899034	0.134318	-0.5	-0.583902
WI	Cadmium	Endosperm type	S2_152505844	2	157225756	0.346	2.52316e-05	0.0454667	0.0899034	0.132082	-0.5	-0.566634
WI	Cadmium	Endosperm type	S2_152506145	2	157226057	0.298	1.79153e-05	0.035296	0.0899034	0.133395	-0.5	-0.642495
WI	Cadmium	Endosperm type	S2_152506168	2	157226080	0.294	8.61915e-06	0.0192967	0.0899034	0.136557	-0.5	-0.674224
WI	Cadmium	Endosperm type	S2_153013827	2	157653584	0.165	6.71876e-06	0.0157584	0.0899034	0.138598	-0.5	-1.01532
WI	Cadmium	Endosperm type	S2_153087164	2	157727563	0.12	1.12503e-06	0.00400324	0.0899034	0.1447	-0.5	-1.02946
WI	Cadmium	Endosperm type	S2_153096922	2	157737319	0.127	1.69357e-08	0.000109063	0.0899034	0.165033	-0.5	-1.14101
WI	Cadmium	Endosperm type	S2_153320296	2	157947243	0.077	2.47542e-07	0.00114304	0.0899034	0.15401	-0.5	-1.21722
WI	Cadmium	Endosperm type	S2_153502939	2	158135247	0.135	6.67841e-07	0.00266707	0.0899034	0.150077	-0.5	-0.89421
WI	Cadmium	Endosperm type	S2_153505521	2	158137829	0.152	1.3801e-06	0.0046248	0.0899034	0.144448	-0.5	-0.8417
WI	Cadmium	Endosperm type	S2_153505544	2	158137852	0.154	2.70494e-06	0.00832682	0.0899034	0.141732	-0.5	-0.812574
WI	Cadmium	Endosperm type	S2_154620944	2	159239552	0.387	1.28114e-06	0.0044024	0.0899034	0.144214	-0.5	-0.699924
WI	Cadmium	Endosperm type	S2_154620962	2	159239570	0.387	7.13661e-07	0.00277505	0.0899034	0.146577	-0.5	-0.720404
WI	Cadmium	Endosperm type	S2_155075089	2	159742973	0.266	2.43715e-08	0.000138507	0.0899034	0.158745	-0.5	-0.761158
WI	Cadmium	Endosperm type	S2_155192894	2	159859622	0.251	2.09013e-05	0.040637	0.0899034	0.133006	-0.5	-0.608881
WI	Cadmium	Endosperm type	S2_155854272	2	160530280	0.447	2.22877e-05	0.041687	0.0899034	0.13294	-0.5	-0.591351
WI	Cadmium	Endosperm type	S2_155895838	2	160571839	0.269	1.61722e-08	0.000109063	0.0899034	0.160907	-0.5	-0.783745
WI	Cadmium	Endosperm type	S2_155904125	2	160580126	0.245	1.84526e-08	0.000109063	0.0899034	0.15993	-0.5	-0.775575
WI	Cadmium	Endosperm type	S2_155904126	2	160580127	0.245	1.84526e-08	0.000109063	0.0899034	0.15993	-0.5	-0.775575
WI	Cadmium	Endosperm type	S2_155904127	2	160580128	0.245	1.84526e-08	0.000109063	0.0899034	0.15993	-0.5	-0.775575
WI	Cadmium	Endosperm type	S2_155904128	2	160580129	0.245	1.84526e-08	0.000109063	0.0899034	0.15993	-0.5	-0.775575
WI	Cadmium	Endosperm type	S2_157033808	2	161666959	0.272	9.09611e-08	0.000463469	0.0899034	0.156715	-0.5	-0.748948	Cd-1
WI	Cadmium	Endosperm type	S2_157214008	2	161855136	0.352	9.91769e-06	0.0218725	0.0899034	0.136585	-0.5	-0.625957	Cd-1
WI	Cadmium	Endosperm type	S2_157214019	2	161855147	0.182	3.86625e-08	0.000211587	0.0899034	0.161347	-0.5	-0.948284	Cd-1
WI	Cadmium	Endosperm type	S2_157234658	2	161883194	0.373	1.13788e-06	0.00400324	0.0899034	0.14548	-0.5	-0.729587	Cd-1
WI	Cadmium	Endosperm type	S2_157236289	2	161884825	0.13	1.0658e-08	8.74915e-05	0.0899034	0.165895	-0.5	-0.993286	Cd-1
WI	Cadmium	Endosperm type	S2_157237947	2	161886483	0.131	1.00661e-12	1.2395e-08	0.0899034	0.205967	-0.5	-1.32732	Cd-1
WI	Cadmium	Endosperm type	S2_157630297	2	162271882	0.156	9.40521e-13	1.2395e-08	0.0899034	0.199612	-0.5	-1.26582	Cd-1
WI	Cadmium	Endosperm type	S2_157636817	2	162278402	0.143	5.3366e-10	4.92842e-06	0.0899034	0.17611	-0.5	-1.19531	Cd-1
WI	Cadmium	Endosperm type	S2_157751785	2	162398572	0.309	1.31793e-07	0.000628191	0.0899034	0.155687	-0.5	-0.728775	Cd-1
WI	Cadmium	Endosperm type	S2_157751802	2	162398589	0.148	4.86807e-15	2.39772e-10	0.0899034	0.227698	-0.5	-1.3286	Cd-1
WI	Cadmium	Endosperm type	S2_157751821	2	162398608	0.148	4.86807e-15	2.39772e-10	0.0899034	0.227698	-0.5	-1.3286	Cd-1
WI	Cadmium	Endosperm type	S2_157755570	2	162402406	0.135	7.47758e-14	1.22767e-09	0.0899034	0.216895	-0.5	-1.34183	Cd-1
WI	Cadmium	Endosperm type	S2_157755615	2	162402451	0.135	3.52945e-14	7.86618e-10	0.0899034	0.218263	-0.5	-1.35906	Cd-1
WI	Cadmium	Endosperm type	S2_157755618	2	162402454	0.135	3.52945e-14	7.86618e-10	0.0899034	0.218263	-0.5	-1.35906	Cd-1
WI	Cadmium	Endosperm type	S2_157755645	2	162402481	0.37	6.0693e-06	0.0150335	0.0899034	0.138419	-0.5	-0.588953	Cd-1
WI	Cadmium	Endosperm type	S2_157755797	2	162402633	0.169	5.61279e-14	1.0367e-09	0.0899034	0.213769	-0.5	-1.16912	Cd-1
WI	Cadmium	Endosperm type	S2_157755884	2	162402720	0.173	1.86742e-14	6.89836e-10	0.0899034	0.219181	-0.5	-1.16376	Cd-1
WI	Cadmium	Endosperm type	S2_157901449	2	162537194	0.333	4.96138e-06	0.0133292	0.0899034	0.137698	-0.5	-0.605325	Cd-1
WI	Cadmium	Endosperm type	S2_157901455	2	162537200	0.333	4.96138e-06	0.0133292	0.0899034	0.137698	-0.5	-0.605325	Cd-1
WI	Cadmium	Endosperm type	S2_158379502	2	163010348	0.167	9.74747e-14	1.44031e-09	0.0899034	0.214031	-0.5	-1.19624	Cd-1
WI	Cadmium	Endosperm type	S2_158379503	2	163010349	0.167	3.72648e-14	7.86618e-10	0.0899034	0.217759	-0.5	-1.21218	Cd-1
WI	Cadmium	Endosperm type	S2_158385874	2	163016720	0.184	2.36522e-12	2.68838e-08	0.0899034	0.199725	-0.5	-1.14149	Cd-1
WI	Cadmium	Endosperm type	S2_158407569	2	163038415	0.266	1.40845e-06	0.0046248	0.0899034	0.145891	-0.5	-0.681992	Cd-1
WI	Cadmium	Endosperm type	S2_158407635	2	163038481	0.302	1.3036e-05	0.0279163	0.0899034	0.137453	-0.5	-0.642365	Cd-1
WI	Cadmium	Endosperm type	S2_158410023	2	163040869	0.201	1.48165e-05	0.0311007	0.0899034	0.135948	-0.5	-0.773952	Cd-1
WI	Cadmium	Endosperm type	S2_158507849	2	163133613	0.433	2.28724e-05	0.0417244	0.0899034	0.134625	-0.5	-0.571806	Cd-1
WI	Cadmium	Endosperm type	S2_158612042	2	163242404	0.437	4.09503e-06	0.0116364	0.0899034	0.1375	-0.5	-0.589439	Cd-1
WI	Cadmium	Endosperm type	S2_158612046	2	163242408	0.436	5.70967e-06	0.0148013	0.0899034	0.136222	-0.5	-0.580962	Cd-1
WI	Cadmium	Endosperm type	S2_158746650	2	163374886	0.46	3.77637e-09	3.28237e-05	0.0899034	0.169347	-0.5	-0.821996	Cd-1
WI	Cadmium	Endosperm type	S2_158969831	2	163640429	0.5	1.15343e-05	0.0250637	0.0899034	0.136368	-0.5	-0.641846	Cd-1
WI	Cadmium	Endosperm type	S2_159765450	2	164415588	0.154	1.97729e-15	2.39772e-10	0.0899034	0.231705	-0.5	-1.3398	Cd-1
WI	Cadmium	Endosperm type	S2_159791238	2	164441365	0.139	3.97975e-06	0.0115305	0.0899034	0.141136	-0.5	-0.981901	Cd-1
WI	Cadmium	Endosperm type	S2_160727986	2	165341400	0.249	1.29348e-11	1.36519e-07	0.0899034	0.191541	-0.5	-1.02138	Cd-1
WI	Cadmium	Endosperm type	S2_160798115	2	165407915	0.29	1.34812e-08	0.000104843	0.0899034	0.163206	-0.5	-0.818716	Cd-1
WI	Cadmium	Endosperm type	S2_160798374	2	165408174	0.321	1.26092e-07	0.000621055	0.0899034	0.154676	-0.5	-0.717972	Cd-1
WI	Cadmium	Endosperm type	S2_160799140	2	165408940	0.28	9.14983e-07	0.00337999	0.0899034	0.14591	-0.5	-0.683873	Cd-1
WI	Cadmium	Endosperm type	S2_160799251	2	165409051	0.288	3.39506e-06	0.010238	0.0899034	0.140244	-0.5	-0.658355	Cd-1
WI	Cadmium	Endosperm type	S2_160799311	2	165409111	0.29	3.86072e-06	0.0114094	0.0899034	0.13959	-0.5	-0.649438	Cd-1
WI	Cadmium	Endosperm type	S2_160799524	2	165409324	0.281	9.00996e-07	0.00337999	0.0899034	0.146115	-0.5	-0.710386	Cd-1
WI	Cadmium	Endosperm type	S2_160802385	2	165412185	0.284	2.92297e-07	0.00119974	0.0899034	0.150838	-0.5	-0.720928	Cd-1
WI	Cadmium	Endosperm type	S2_160802387	2	165412187	0.284	2.92297e-07	0.00119974	0.0899034	0.150838	-0.5	-0.720928	Cd-1
WI	Cadmium	Endosperm type	S2_160802399	2	165412199	0.277	2.65208e-07	0.00115262	0.0899034	0.150411	-0.5	-0.72046	Cd-1
WI	Cadmium	Endosperm type	S2_160802407	2	165412207	0.277	1.896e-06	0.00596079	0.0899034	0.142383	-0.5	-0.658129	Cd-1
WI	Cadmium	Endosperm type	S2_160805224	2	165415024	0.322	6.24386e-08	0.000329502	0.0899034	0.158069	-0.5	-0.780204	Cd-1
WI	Cadmium	Endosperm type	S2_160980739	2	165544799	0.186	4.48906e-10	4.42208e-06	0.0899034	0.171143	-0.5	-1.10114	Cd-1
WI	Cadmium	Endosperm type	S2_164980593	2	169711019	0.213	2.16927e-05	0.0410943	0.0899034	0.133376	-0.5	0.711365
WI	Cadmium	Endosperm type	S2_164980599	2	169711025	0.213	2.16927e-05	0.0410943	0.0899034	0.133376	-0.5	0.711365
WI	Cadmium	Endosperm type	S2_170772140	2	175506789	0.197	2.65216e-07	0.00115262	0.0899034	0.15266	-0.5	-0.959526
WI	Cadmium	Endosperm type	S2_170861025	2	175583176	0.098	6.42407e-06	0.0153102	0.0899034	0.139205	-0.5	-0.931712
WI	Cadmium	Endosperm type	S2_170867474	2	175589625	0.098	6.38982e-06	0.0153102	0.0899034	0.139365	-0.5	-0.899135
WI	Cadmium	Endosperm type	S2_170874412	2	175596188	0.109	1.60783e-06	0.00516469	0.0899034	0.145774	-0.5	-0.939225
WI	Cadmium	Endosperm type	S2_176614222	2	181877371	0.403	6.10449e-06	0.0150335	0.0899034	0.138367	-0.5	0.592105
WI	Cadmium	Endosperm type	S2_176906332	2	182174353	0.474	2.27769e-05	0.0417244	0.0899034	0.132371	-0.5	-0.624373
WI	Cadmium	Endosperm type	S2_178081414	2	183500275	0.481	5.92767e-06	0.0150335	0.0899034	0.137967	-0.5	0.623582
WI	Cadmium	Endosperm type	S2_178081454	2	183500315	0.467	8.55979e-06	0.0192967	0.0899034	0.136208	-0.5	0.615921
WI	Cadmium	Endosperm type	S2_178081462	2	183500323	0.467	8.55979e-06	0.0192967	0.0899034	0.136208	-0.5	0.615921
WI	Cadmium	Endosperm type	S3_229554281	3	233472366	0.473	5.4019e-06	0.0142535	0.0899034	0.140004	-0.5	-0.617397
WI	Calcium		S10_123187571	10	124226277	0.102	4.04519e-07	0.0199242	0.043982	0.117658	-0.5	0.00741257
WI	Calcium		S10_124069084	10	125112781	0.119	6.08819e-08	0.00899604	0.043982	0.124855	-0.5	0.00697052
WI	Calcium		S10_126912721	10	127948622	0.062	3.52584e-07	0.0199242	0.043982	0.119857	-0.5	0.00887972
WI	Calcium		S10_127919463	10	129045348	0.084	1.02763e-06	0.0379613	0.043982	0.11456	-0.5	0.00748579
WI	Zinc		S7_174512415	7	180073538	0.309	6.85411e-07	0.0337592	0.15649	0.207438	1	-0.671676	Zn-7
WI	Zinc		S7_174515604	7	180076727	0.347	7.74557e-08	0.011445	0.15649	0.216357	1	-0.705554	Zn-7
WI	Zinc		S7_174515799	7	180076922	0.443	1.13746e-06	0.0420182	0.15649	0.205608	1	-0.625275	Zn-7
WI	Zinc		S7_174520166	7	180081289	0.383	3.03552e-07	0.0224267	0.15649	0.212571	1	-0.681679	Zn-7
